# Supplementary material for: Expression of CD44 in Leukocyte Subpopulations in Patients with Inflammatory Bowel Diseases
Source: MDPI journal article supplement (doi:10.3390/diagnostics12082014), 2022-08-20
Supplement: s1 [file s1]

# Expression of CD44 in monocyte and lymphocyte subpopulations in patients with inflammatory bowel diseases

Ivana Franić<sup>1</sup>, Nikolina Režić Mužinić<sup>2\*</sup>, Anita Markotić<sup>2</sup>, Piero Marin Živković<sup>3</sup>, Marino Vilović<sup>4</sup>, Doris Rušić<sup>5</sup>, and Joško Božić<sup>4</sup>

**Table S1.** Basic characteristics of IBD and control group.

| Parameter        | IBD (n = 46)   | Control (n = 48) | <i>p</i> |
|------------------|----------------|------------------|----------|
| Age              | 40.97 ± 12.65  | 39.04 ± 12.93    | 0.456*   |
| Male gender      | 26 (56.5%)     | 34 (70.8%)       | 0.149**  |
| Body weight (kg) | 75.054 ± 15.47 | 83.02 ± 13.01    | 0.008*   |
| Body height (cm) | 176 ± 9.52     | 181.14 ± 9.54    | 0.0117*  |
| BMI              | 24.12 ± 4.27   | 25.2 ± 2.78      | 0.15*    |
| Active smoking   | 13 (28.2%)     | 10 (20.8%)       | 0.402**  |

Basic parametric data are presented as mean ± standard deviation for parametric data, categorical data are presented as number (percentage). IBD: inflammatory bowel disease; BMI: body mass index; \*Student t-test for independent samples. \*\* Chi-square test.

**Table S2.** Comparison of basic anthropometric and disease characteristics between Ulcerative Colitis and Crohn's Disease.

| Parameter        | UC (n = 18)   | Crohn (n = 28) | <i>p</i> |
|------------------|---------------|----------------|----------|
| Age              | 42 ± 12.3     | 40.32 ± 13.04  | 0.66*    |
| Male gender      | 10 (55.5%)    | 16 (57.1%)     | 0.577**  |
| Body weight (kg) | 79.78 ± 13.78 | 72 ± 15.98     | 0.097*   |
| Body height (cm) | 176.80 ± 7.52 | 176.6 ± 10.72  | 0.67*    |
| BMI              | 25.55 ± 4.30  | 23.211 ± 4.06  | 0.069*   |
| Active smoking   | 1 ( 5.5%)     | 12 (66.6%)     | 0.006**  |
| SES CD           | /             | 13.67 ± 11.17  |          |
| UCIS             | 4.38 ± 2.91   | /              |          |

Basic parametric data are presented as mean ± standard deviation, categorical data are presented as number (percentage). BMI: body mass index; SES-CD: simple endoscopic score for Crohn's disease; UCEIS: ulcerative colitis endoscopic index of severity; UC: Ulcerative Colitis \* Student t-test for independent samples. \*\* Chi-square test. \*\*\* Mann-Whitney U test.

**Table S3.** Comparison of selected laboratory characteristics of Ulcerative Colitis and Crohn's Disease.

| Parameter                       | UC (n = 18)     | Crohn (n = 28)   | <i>p</i> |
|---------------------------------|-----------------|------------------|----------|
| WBC (x10 <sup>9</sup> /L)       | 5.68 ± 1.45     | 7.6 ± 2.92       | 0.013*   |
| RBC (x10 <sup>12</sup> /L)      | 4.619 ± 0.76    | 4.64 ± 0.49      | 0.892*   |
| Platelets (x10 <sup>9</sup> /L) | 232 ± 72.39     | 283 ± 87.99      | 0.054*   |
| Albumins (g/L)                  | 39.59 ± 3.89    | 37.14 ± 6.17     | 0.14*    |
| ESR (mm/h)                      | 15.94 ± 16.22   | 16.82 ± 19.49    | 0.875*   |
| Hb (g/L)                        | 137.22 ± 23.14  | 134.82 ± 18.52   | 0.699*   |
| Hct (L/L)                       | 0.416 ± 0.065   | 0.41 ± 0.049     | 0.762*   |
| LDH (mmol/L)                    | 168 ± 34.12     | 161.22 ± 48.41   | 0.57*    |
| ALP (U/L)                       | 73.75 ± 48.29   | 79.66 ± 39.42    | 0.55*    |
| hs-CRP (mg/l)                   | 2.52 ± 3.91     | 14.77 ± 30.96    | 0.103*   |
| FC (mg/kg)                      | 356.05 ± 480.49 | 753.32 ± 1314.35 | 0.226*   |

Data are presented as mean ± standard deviation. UC: Ulcerative Colitis; WBC – white blood cells; RBC – red blood cells; ESR – erythrocyte sedimentation rate; Hb – hemoglobin; Hct – hematocrit; LDH – lactate dehydrogenase; ALP – alkaline phosphatase; hs-CRP – high sensitivity C-reactive protein; FC – fecal calprotectin. \*Student t-test for independent samples.

**Table S4.** Comparison of selected disease characteristics between Crohn's Disease subgroups according to biologic therapy.

| Parameter        | Biological therapy (n = 18) | Non-biological therapy (n = 10) | <i>p</i> |
|------------------|-----------------------------|---------------------------------|----------|
| Age              | 41.44 ± 13.87               | 38.3 ± 11.83                    | 0.0551*  |
| Male gender      | 11 (61.1%)                  | 5 (50%)                         | 0.43**   |
| Body weight (kg) | 74.6 ± 14.06                | 67.3 ± 18.81                    | 0.251*   |
| Body height (cm) | 175 ± 10.35                 | 175 ± 11.92                     | 0.814*   |
| BMI              | 24 ± 3.64                   | 21.44 ± 4.36                    | 0.085*   |
| Active smoking   | 8 (44.4%)                   | 2 (20%)                         | 0.076**  |
| SES CD           | 11.12 ± 9.69                | 18.24 ± 12.69                   | 0.108*   |

Basic parametric data are presented as mean ± standard deviation, categorical data are presented as number (percentage). BMI: body mass index; SES-CD: simple endoscopic score for Crohn's disease; \* Student t-test for independent samples. \*\* Chi-square test. \*\*\* Mann-Whitney U test.

**Table S5.** Comparison of selected laboratory characteristics of Crohn's Disease subgroups according to biologic therapy.

| Parameter                       | Biological therapy (n = 18) | Non-biological therapy (n = 10) | <i>p</i> |
|---------------------------------|-----------------------------|---------------------------------|----------|
| WBC (x10 <sup>9</sup> /L)       | 8.2 ± 3.3                   | 6.51 ± 1.73                     | 0.144*   |
| RBC (x10 <sup>12</sup> /L)      | 4.76 ± 0.63                 | 4.41 ± 0.91                     | 0.653*   |
| Platelets (x10 <sup>9</sup> /L) | 261 ± 59.4                  | 323 ± 117.4                     | 0.072*   |
| Albumins                        | 38.66 ± 4.1                 | 34.3 ± 8.33                     | 0.08*    |
| ESR (mm/h)                      | 11.22 ± 9.43                | 26.9 ± 28.2                     | 0.038*   |
| Hb (g/L)                        | 139 ± 12.78                 | 126 ± 24.45                     | 0.072*   |
| Hct (L/L)                       | 0.432 ± 0.045               | 0.396 ± 0.084                   | 0.127*   |
| LDH (mmol/L)                    | 164.5 ± 26.17               | 174.7 ± 46.1                    | 0.459*   |
| ALP (U/L)                       | 63.55 ± 16                  | 92.1 ± 77                       | 0.136*   |
| FC (mg/kg)                      | 265.11 ± 299                | 1632 ± 1917                     | 0.005*   |
| hs-CRP (mg/l)                   | 8.88 ± 24.09                | 25.37 ± 39.81                   | 0.181*   |

Data are presented as mean ± standard deviation. WBC – white blood cells; RBC – red blood cells; ESR – erythrocyte sedimentation rate; Hb – hemoglobin; Hct – hematocrit; LDH – lactate dehydrogenase; ALP – alkaline phosphatase; FC – fecal calprotectin; hs-CRP – high sensitivity C-reactive protein. \*Student t-test for independent samples.

**Table S6.** Comparison of selected disease characteristics between Ulcerative colitis subgroups according to biologic therapy.

| Parameter        | Biological therapy (n = 10) | Non-biological therapy (n = 8) | <i>p</i> |
|------------------|-----------------------------|--------------------------------|----------|
| Age              | 43.4 ± 14.06                | 40.25 ± 10.36                  | 0.6*     |
| Male gender      | 6 (60%)                     | 4 (50%)                        | 0.52**   |
| Body weight (kg) | 84.5 ± 12.176               | 73.87 ± 14.09                  | 0.105*   |
| Body height (cm) | 176 ± 11                    | 176 ± 8.51                     | 0.94*    |
| BMI              | 26.98 ± 3.53                | 23.75 ± 4.73                   | 0.116*   |
| Active smoking   | 0 (0%)                      | 1 (12.5%)                      | 0.444**  |
| USEIS            | 4.5 ± 2.63                  | 4.25 ± 3.41                    | 0.862*   |

Basic parametric data are presented as mean ± standard deviation, non-parametric data are presented as median (interquartile range) and categorical data are presented as number (percentage). BMI: body mass index; UCEIS: ulcerative colitis endoscopic index of severity; \* Student t-test for independent samples. \*\* Chi-square test. \*\*\* Mann–Whitney U test.

**Table S7.** Comparison of selected laboratory characteristics of Ulcerative colitis subgroups according to biologic therapy.

| Parameter                       | Biological therapy (n = 10) | Non-biological therapy (n = 8) | <i>p</i> |
|---------------------------------|-----------------------------|--------------------------------|----------|
| WBC (x10 <sup>9</sup> /L)       | 6.2 ± 1.45                  | 4.93 ± 1.067                   | 0.048*   |
| RBC (x10 <sup>12</sup> /L)      | 4.67 ± 0.435                | 4.58 ± 0.604                   | 0.316*   |
| Platelets (x10 <sup>9</sup> /L) | 247 ± 85.15                 | 214 ± 34.97                    | 0.319*   |
| Albumins                        | 39.9 ± 1.59                 | 39.2 ± 5.72                    | 0.715*   |
| ESR (mm/h)                      | 12.4 ± 11.37                | 20.37 ± 20.79                  | 0.314*   |
| Hb (g/L)                        | 141 ± 17.08                 | 132 ± 29.62                    | 0.44*    |
| Hct (L/L)                       | 0.42 ± 0.035                | 0.39 ± 0.067                   | 0.263*   |
| LDH (mmol/L)                    | 176.2 ± 29.5                | 142.5 ± 62.05                  | 0.147*   |
| ALP (U/L)                       | 73.8 ± 16.04                | 87 ± 57.7                      | 0.496*   |
| FC (mg/kg)                      | 212.2 ± 328.5               | 535 ± 596                      | 0.161*   |
| hs-CRP (mg/l)                   | 1.49 ± 1.52                 | 3.81 ± 5.53                    | 0.22*    |

Data are presented as mean ± standard deviation. WBC – white blood cells; RBC – red blood cells; ESR – erythrocyte sedimentation rate; Hb – hemoglobin; Hct – hematocrit; LDH – lactate dehydrogenase; ALP – alkaline phosphatase; FC – fecal calprotectin; hs-CRP – high sensitivity C-reactive protein. \*Student t-test for independent samples.
